# Supplementary material
Source: PubMed Central journal article supplement (PMC5118663)

**Table S1.** Categories of NPC patients according to the quartiles of CRP/ALB ratio.

| Categories | Case ( <i>n</i> ) | CRP/ALB ratio     |        | TNM stage ( <i>n</i> ) |    |     |       |
|------------|-------------------|-------------------|--------|------------------------|----|-----|-------|
|            |                   | Mean $\pm$ SD     | Median | I                      | II | III | IVa-b |
| Quartile 1 | 179               | 0.051 $\pm$ 0.031 | 0.056  | 6                      | 37 | 93  | 43    |
| Quartile 2 | 179               | 0.115 $\pm$ 0.014 | 0.114  | 3                      | 19 | 107 | 50    |
| Quartile 3 | 180               | 0.154 $\pm$ 0.112 | 0.155  | 3                      | 25 | 100 | 52    |
| Quartile 4 | 181               | 0.500 $\pm$ 0.433 | 0.264  | 2                      | 17 | 81  | 81    |

**Figure S1.** (A) Overall survival curves of NPC patients with stage I-II stratified by the CRP/ALB ratio ( $P = 0.301$ ). (B) Overall survival curves of NPC patients with stage III-IV stratified by the CRP/ALB ratio ( $P < 0.001$ ).

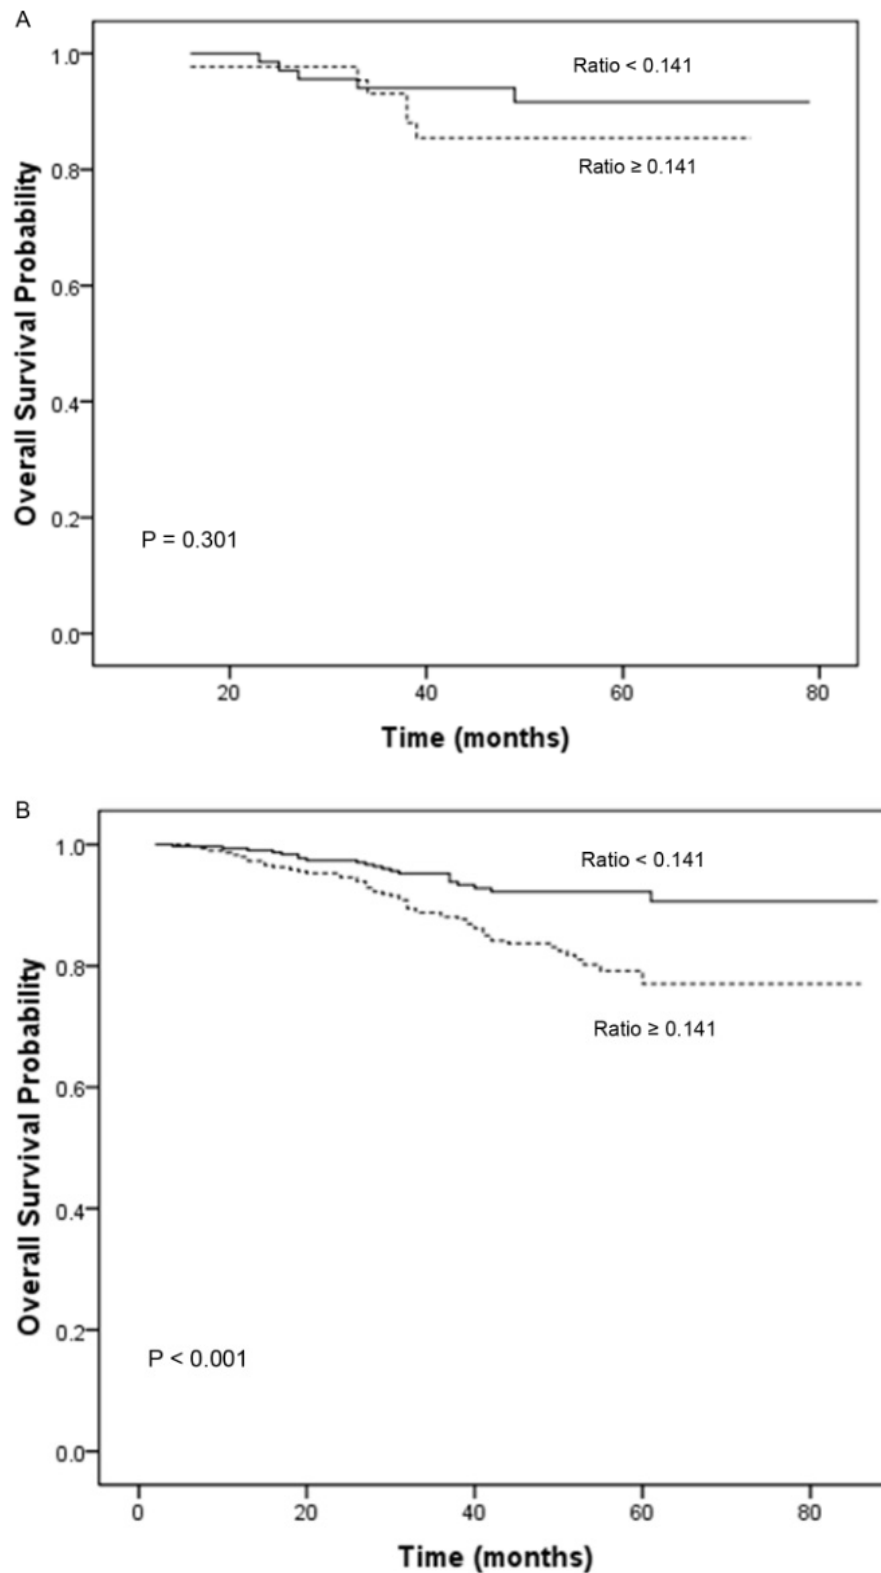

Supplement: jcav07p2005s1.pdf [file jcav07p2005s1.pdf]
